# Supplementary material for: The Tonsil Lymphocyte Landscape in Pediatric Tonsil Hyperplasia and Obstructive Sleep Apnea
Source: Front Immunol. 2021 Oct 22;12:674080. doi: 10.3389/fimmu.2021.674080 (PMC8570126; doi:10.3389/fimmu.2021.674080)
Supplement: Supplementary file 2 [file DataSheet_2.xlsx]

## Sheet: Small_ILCs
	MFI	1	2	3	4	5	6	7	8	9	10	11		SD	1	2	3	4	5	6	7	8	9	10	11
	KLRG1 APC	107	330	43.8	46.6	30	28.5	48.4	40.4	46.9	57.5	44		KLRG1 APC	87.4	300	52.1	55.2	46.3	107	128	49.2	127	71.3	52.8
	CD69 A700	477	38.4	148	162	67.6	14.7	-8.99	84.2	23.6	221	72.3		CD69 A700	305	89.2	134	189	153	67.4	74.1	147	80.4	193	145
	CD161 APC-Cy7	182	664	381	463	166	6.29	8.34	403	-7.03	511	251		CD161 APC-Cy7	337	391	259	303	286	88.8	147	300	45.6	284	285
	CD45RA BUV737	84.2	223	66.5	159	629	72.6	587	120	468	61.8	458		CD45RA BUV737	154	356	155	300	588	168	495	229	417	128	547
	CRTH2 V450	13.3	164	11.2	13.1	8.31	31.5	8.89	14.1	8.98	15.9	8.22		CRTH2 V450	19.6	260	19.6	22.8	20.1	31.7	18.3	18.9	17.8	19.6	20.3
	CD4 V510	81.7	57.6	66.1	58.8	42.9	1069	52.9	54	49.3	65.6	46.4		CD4 V510	31.8	33.7	30.2	62	28.4	1118	30.8	31	99.6	35.7	29.7
	CD25 V650	55.4	241	33	95.7	179	4.75	1.42	67.4	18.1	65.8	178		CD25 V650	85.8	148	57.7	117	522	77.2	49.9	139	38	164	171
	CD56 V711	166	21.7	43.9	941	547	60.8	15.9	865	18.1	1189	38.1		CD56 V711	499	30.5	56.6	1148	828	55.9	29	1401	33.6	1413	49
	CD3 BV785	20	23	14.4	33	26.2	45.7	8.78	31.1	45.2	32.3	14.1		CD3 BV785	34.5	36.3	38.9	48.7	48.8	52.6	34.3	54.1	59.7	50.7	41.8
	NRP1 PE	255	33.9	319	59.7	28.8	16.2	35.3	415	17.9	778	35.3		NRP1 PE	981	27.9	576	59.8	45.6	22.5	68.5	557	30.6	844	68.2
	CD62L CD	-1.59	70.7	8.07	12.4	33.9	26.1	112	13.8	36.1	5.27	27.5		CD62L CD	36	366	40.4	45.1	232	99.2	284	113	158	45.5	261
	NKp44 PECy5	1463	0.33	417	257	25.9	5.88	532	170	8.15	742	32.3		NKp44 PECy5	932	44.2	463	479	46.5	27.4	772	367	34.4	591	89.3
	CD117 PECy5-5	131	50.6	205	270	326	28.4	202	219	9.05	324	277		CD117 PECy5-5	140	85.4	218	254	308	3267	1388	227	27.7	229	247
														Cell count	122	725	937	1154	785	62	49	910	471	949	1036
	ILC2
	Lti-like
	Naïve ILC3
	Mature ILC3
	Other

## Sheet: Large_ILCs
	MFI	1	2	3	4	5	6	7	8	9	10	11	12		SD	1	2	3	4	5	6	7	8	9	10	11	12
	KLRG1 APC	18.9	16.5	41.4	39.5	347	38.9	43.9	31.9	44.4	41.9	40.6	14.9		KLRG1 APC	41.5	39.4	67.6	52.4	313	46	64	58.5	195	171	59.2	52.5
	CD69 A700	96.7	24.9	137	31	31.4	37.7	136	57.4	13.4	-83.5	154	473		CD69 A700	183	87.9	198	130	95.4	56.9	178	143	82.2	103	171	354
	CD161 APC-Cy7	140	-1.66	501	215	599	322	475	215	-15.5	-0.83	389	4.13		CD161 APC-Cy7	211	73.5	299	295	331	263	292	299	37	58.6	283	89.9
	CD45RA BUV737	693	84.8	166	658	255	60.4	104	548	467	338	93.1	238		CD45RA BUV737	592	254	291	615	366	65.9	254	580	631	357	299	422
	CRTH2 V450	0.59	32.3	11.3	3.59	143	5.73	11.5	7.31	7.11	7.9	6.5	11.7		CRTH2 V450	18.9	25.8	20.3	23.3	255	18.9	20	18.4	20.5	18.8	17.5	18.7
	CD4 V510	39.7	1433	56.5	43.5	46.4	48.7	57.4	40.2	45.9	52.7	62.8	77		CD4 V510	24.8	975	33.8	28.2	35.7	31.4	34.1	31	115	120	31.8	29.7
	CD25 V650	360	10.1	102	207	232	98.1	83.8	187	21.7	-15.5	53.8	54.9		CD25 V650	1076	189	120	187	156	155	124	166	43.6	56.2	105	52
	CD56 V711	154	59.2	1027	41.4	18.8	72.8	1029	570	18.8	27.5	54.2	198		CD56 V711	540	35.9	1072	58.2	40.8	413	1166	737	36.8	76.6	68.3	661
	CD3 BV785	15.1	113	27.8	7.41	19.6	7.37	25.7	16.6	55.6	0.95	8.17	14.9		CD3 BV785	46.8	87.9	50.5	41.3	41.1	44.9	51.5	47.4	90.1	52.9	41.4	39.6
	NRP1 PE	27.1	6.64	50.5	25.5	27.1	41.7	442	30.3	12.5	-0.13	136	38.5		NRP1 PE	37.1	41.7	49.1	37.1	22.8	46.4	543	59.6	26.9	58.7	511	88.9
	CD62L CD	380	16.6	8.63	22.2	47.8	8.14	4.81	20.8	23	55.1	3.53	16.3		CD62L CD	627	96.1	36.7	113	258	68.1	92.1	56.7	190	203	38.3	26.4
	NKp44 PECy5	27.1	2	419	18.3	-8.74	30.6	317	29.9	4.27	15.1	345	443		NKp44 PECy5	59.3	29.1	448	47.1	38.6	54.2	540	59	68.2	1077	518	789
	CD117 PECy5-5	299	5.35	275	272	41.1	219	251	266	8.17	631	204	40.5		CD117 PECy5-5	225	19.6	264	261	77.8	269	233	277	29.7	5374	220	89.2
															Cell count	165	206	934	952	790	240	1334	1059	534	55	879	57
	ILC2
	Lti-like
	Naïve ILC3
	Mature ILC3
	Other
	CD45RA-NKp44-ILC3

## Sheet: Small_B_cells_Panel1
	MFI	1	2	3	4	5	6	7	8	9	10	11	12	13		SD	1	2	3	4	5	6	7	8	9	10	11	12	13
	CD19 Fitc	185	319	347	222	251	299	162	207	98.3	145	341	188	280		CD19 Fitc	82.3	189	175	96.9	204	179	94.3	119	58	83.1	262	80.7	176
	IgM V582	294	61.3	69.2	1487	1011	792	626	57.3	34.1	752	69.6	1085	61.4		IgM V582	169	110	78.4	1088	1025	1122	682	55.2	53.3	681	97.1	720	78.8
	CD27 PE	39	2673	580	69.7	230	302	16.5	123	44.3	37.6	36.9	23	485		CD27 PE	32.5	3677	680	45	432	946	26.8	105	144	32.2	36.4	28.3	869
	CXCR5 PE-Vio615	563	134	472	681	312	495	228	323	164	435	171	459	249		CXCR5 PE-Vio615	413	210	354	324	382	457	132	206	128	220	152	177	268
	CD20 PE-Cy5	2092	825	11182	2312	2164	4894	840	7995	4178	2313	3951	1451	2904		CD20 PE-Cy5	1710	937	7800	1612	3238	4468	1174	4479	2970	1424	4921	774	3453
	CD38 PE-Cy7	422	12737	3744	623	170	2694	196	2139	925	131	127	417	182		CD38 PE-Cy7	0.076	0.067	0.038	0.065	0.099	0.053	0.081	0.041	0.06	0.084	0.1	0.06	0.11
																Cell count	1746	524	1754	1902	1158	537	1432	1368	1116	1620	623	1768	2452
	Naïve
	GC
	Plasmablasts
	IgM CD27+
	Memory

## Sheet: Large_B_cells_Panel1
	MFI	1	2	3	4	5	6	7	8	9	10	11	12	13	14	15	16		SD	1	2	3	4	5	6	7	8	9	10	11	12	13	14	15	16
	CD19 Fitc	259	370	179	310	165	362	336	264	236	206	153	206	142	140	116	200		CD19 Fitc	139	266	91.7	161	87.9	222	212	183	154	79.4	62.2	109	62.7	72.3	82.8	160
	IgM V582	101	111	1482	60	984	1406	44	1047	60	471	819	1486	616	194	28	1120		IgM V582	98.6	175	892	86.4	762	1134	91.4	1018	65.2	186	320	1087	261	123	58.6	1146
	CD27 PE	79	45	0.95	489	33	45	1614	229	564	63	50	65	16	29	59	354		CD27 PE	66.3	57	22.2	666	32.5	31.5	3213	1202	1044	62.5	24.6	59.2	22.7	27.4	112	744
	CXCR5 PE-Vio615	434	122	410	449	282	459	127	514	209	626	541	527	322	337	182	283		CXCR5 PE-Vio615	254	250	172	312	150	192	162	348	207	491	228	300	149	438	151	217
	CD20 PE-Cy5	8349	4592	1492	8893	1328	4310	755	4259	2263	2156	2218	1798	1295	1483	4658	1651		CD20 PE-Cy5	4720	4759	1638	5512	1675	3628	769	4048	2798	1732	1274	1726	1513	1488	3279	2575
	CD38 PE-Cy7	2425	177	334	3348	85	174	15488	2082	165	546	178	508	339	239	1077	202		CD38 PE-Cy7	0.17	0.38	0.29	0.15	0.34	0.23	0.27	0.25	0.43	0.27	0.17	0.25	0.32	0.38	0.25	0.52
																			Cell count	950	376	1351	1270	1613	462	305	898	1409	859	623	2199	1702	1909	1165	914
	Naïve
	GC
	Plasmablasts
	IgM CD27+
	Memory

## Sheet: Small_T_cell
	MFI	1	2	3	4	5	6	7	8	9	10	11	12	13		SD	1	2	3	4	5	6	7	8	9	10	11	12	13
	CCR7 APCCy7	23.6	214	4.6	15.4	2.74	-14.8	67.3	54.2	11.7	319	110	-19.3	75.8		CCR7 APCCy7	69.9	144	52.1	60.6	67.9	82.3	117	81.2	54.2	156	101	81.6	118
	CD45RA BUV737	563	2970	21.9	48.6	70.4	214	88.5	42.7	204	1785	71	4647	129		CD45RA BUV737	1472	1770	84.7	89.1	123	1364	170	94.6	218	1380	120	2165	130
	ICOS V450	64	78.9	3497	2250	2124	155	2769	2830	3946	136	531	135	2248		ICOS V450	120	481	2788	2218	2564	601	3446	3304	3762	297	653	451	2431
	CD4 V500	63	37.4	1757	1697	1064	61.3	2008	1667	1580	1484	1583	95.3	1651		CD4 V500	131	47.1	810	870	726	76.4	1928	797	697	499	758	198	738
	PD1 BV605	153	101	5959	4173	3591	371	1210	710	6760	131	435	132	1687		PD1 BV605	410	99.8	3760	3718	3505	571	1019	574	2821	189	530	243	1430
	CD25 BV650	62.8	81.5	199	15.7	145	88.1	177	791	264	47.6	63	68.3	224		CD25 BV650	50	67.2	163	84.7	216	84.7	274	1054	499	135	89.4	57.3	308
	CD8 BV711	1.57	3988	-20.3	21.9	803	4465	-2.88	-5.63	63.1	-14.3	-7.44	15.8	3.98		CD8 BV711	60	1546	78.2	78.2	966	2666	67.2	76.8	97.3	46.1	54.3	107	61.8
	CD27 PE	1994	2278	3428	2325	2186	2479	884	3668	4049	1932	1158	6882	2854		CD27 PE	1993	1698	1849	1807	2020	2177	1802	2790	2292	1521	1142	4400	2014
	CXCR5 PE-Vio615	44.7	30.9	548	427	233	59	-6.86	68.1	1078	12.6	87.9	84.3	204		CXCR5 PE-Vio615	88.9	65	525	473	428	82.3	50.6	110	772	56.6	104	115	163
	CD38 PECy7	97	239	715	435	640	210	978	152	897	391	196	1762	1075		CD38 PECy7	0.12	0.094	0.077	0.098	0.086	0.14	0.093	0.14	0.067	0.085	0.11	0.056	0.078
																Cell count	376	1565	1923	2227	459	1168	935	311	1043	2771	2988	565	1509
	Tfh
	Naïve CD8
	Effector CD8
	Naïve CD4
	Memory CD4
	DN
	DP

## Sheet: Large_T_cell
	MFI	1	2	3	4	5	6	7	8	9	10	11	12	13	14	15		MFI	1	2	3	4	5	6	7	8	9	10	11	12	13	14	15
	CCR7 APCCy7	15.4	44.5	10.9	44.7	120	230	183	15.9	81.4	12	6.69	324	-19.7	-32.5	-0.66		CCR7 APCCy7	39.3	77.8	52.9	68.4	117	163	124	54.2	100	75.8	82.6	172	81.1	67	42.5
	CD45RA BUV737	87.2	83.7	127	83.7	84.2	2595	105	51	88.2	94.5	2929	1638	187	2208	86.3		CD45RA BUV737	102	108	136	111	128	1492	138	102	452	140	1884	1150	321	1692	104
	ICOS V450	99.9	1255	3858	1632	540	60.4	2302	2825	869	2653	99.6	111	163	80.1	3121		ICOS V450	185	3000	3298	2757	678	148	2566	2279	2225	2969	543	239	517	339	3071
	CD4 V500	65.3	1836	1596	1599	1511	52.2	1842	1808	1638	1318	81.8	1312	69.8	69.9	1626		CD4 V500	140	982	768	886	833	62.3	990	1023	738	1000	191	539	125	46	854
	PD1 BV605	465	895	5856	1344	430	98.7	1212	5297	456	3364	161	123	468	185	3532		PD1 BV605	752	1979	2914	1354	570	92.1	1139	3359	746	3028	290	104	590	195	2202
	CD25 BV650	69.1	151	254	169	54.4	81.8	299	10.5	221	186	64.6	59.4	95.7	95.4	234		CD25 BV650	64.6	309	160	289	90.2	60.6	580	89.4	769	423	60.1	75.9	73.2	83.7	310
	CD8 BV711	5.34	-0.73	21.9	6.6	-1.98	3743	-6.31	32.1	0.81	997	27.4	-6.1	4494	3774	2.67		CD8 BV711	61.3	64.2	86.8	59.1	41	1685	55.7	71.5	64.5	1369	70.9	41.2	2519	2504	66.3
	CD27 PE	2305	-8.1	2931	1545	913	1813	2513	2546	2031	1646	4410	1704	1908	2911	2756		CD27 PE	2676	46.5	2022	1663	1086	1484	2365	1976	2311	2364	4074	1360	2151	2281	1813
	CXCR5 PE-Vio615	44.9	-11.1	710	38.9	105	23.5	180	418	13.6	146	54.6	8.55	49.2	39.2	217		CXCR5 PE-Vio615	83.1	71.3	557	89.9	98.6	50.4	166	395	64.9	361	109	61	78.7	67.1	141
	CD38 PECy7	312	283	779	591	177	208	901	526	58.4	778	532	396	343	128	700		CD38 PECy7	0.23	0.3	0.14	0.19	0.22	0.19	0.18	0.17	0.18	0.18	0.35	0.16	0.25	0.27	0.2
																		Cell count	94	98	3099	1790	2039	1268	495	1867	491	489	633	2765	1030	424	1415
	Tfh
	Naïve CD8
	Effector CD8
	Naïve CD4
	Memory CD4
	DN
	DP

## Sheet: Small_atypical_B_cells
	MFI	1	2	3	4	5	6	7	8	9	10	11		SD	1	2	3	4	5	6	7	8	9	10	11
	CD11c Fitc	21.6	53.8	59.8	46.3	107	77.8	37.5	63.9	49.7	40	159		CD11c Fitc	25.3	28.8	46.7	26.5	41.7	52.6	20.4	31.2	18.1	21.4	190
	Ki67 A700	14.9486	163.864	61.6685	66.1251	96.0814	456.044	32.7913	240.748	73.5786	55.7234	81.9233		Ki67 A700	32.4	247	53.7	58.7	78.4	354	35	286	48.9	40.7	144
	FcRL4 BUV395	15.6	30.6	39.3	32.3	59.1	54	27	41.3	30.8	28.1	307		FcRL4 BUV395	19.9	21.6	32.1	24.5	31	27.9	23.6	26.5	19.3	20.1	385
	FcRL5 BUV737	47.0048	21.3161	82.3219	116.016	279.162	44.256	37.326	48.1448	50.8445	0.536211	376.72		FcRL5 BUV737	51.3	48	166	185	335	92.4	77.3	70.9	68.8	41	676
	CD20 v450	2161.22	1313.05	3264.49	3218.36	1149.18	6867.84	1674.21	5410.41	2989.49	2517.5	6156.85		CD20 v450	1054	1101	2379	1678	1861	5045	1125	3057	1196	1068	3758
	CD21 BV605	1327	343.054	1747.58	2332.37	1047.3	2076.26	1191.41	1617.62	716.538	1507.14	829.947		CD21 BV605	1031	266	2339	2308	1547	2145	1146	1410	405	1320	1932
	CD19 BV786	561	302	978	787	1435	1925	473	1216	768	675	1764		CD19 BV786	315	250	588	430	988	963	329	675	478	342	1238
	CD27 PE	7.46462	33.4399	289.422	15.7872	1560.67	425.999	11.5404	91.7494	0.658214	13.0395	121.356		CD27 PE	26.7	69.4	361	36.2	2612	487	25.5	86	21.4	27.6	352
	T-bet PE-CF594	7.32	8.99	23.7	20.8	23.6	28.2	11.2	19.9	31.5	4.59	54.7		T-bet PE-CF594	32.1	30.5	51.3	45.5	63.8	52.6	30.6	38.8	23.3	37.8	103
	CD38 PECy7	145.179	317.342	70.0299	161.08	5996.49	1805.59	26.5595	1063.88	606.044	187.944	53.2484		CD38 PECy7	151	363	174	263	6108	1036	28.2	664	476	197	219
														Cell count	1256	958	2447	2691	822	1764	1903	1698	373	2262	1826
	CD27-
	GC
	Plasmablasts
	Atypical
	CD27+

## Sheet: Large_atypical_B_cells
		1	2	3	4	5	6	7	8	9	10	11	12	13		SD	1	2	3	4	5	6	7	8	9	10	11	12	13
	CD11c Fitc	38.1	70.7	123	41.2	38.3	54	112	23.2	208	63	49.5	46.4	61.9		CD11c Fitc	25.4	42.4	166	18.6	22.9	29.6	51.1	21.6	207	33.4	21.1	27	68.4
	Ki67 A700	49.7206	379.065	149.471	42.8327	70.6897	182.321	103.858	20.1062	98.4571	211.663	85.6982	55.0217	62.8115		Ki67 A700	37.1	364	231	29.8	36.2	217	112	32.5	167	302	45.7	67.4	53.2
	FcRL4 BUV395	29.7	52.2	316	30.1	25.1	32.7	56.6	20	444	43.9	40.6	34.8	45.9		FcRL4 BUV395	21.4	43.4	363	18.1	22.5	26.1	27.8	20.8	504	31.5	23.4	29.7	54.6
	FcRL5 BUV737	8.23896	53.3635	244.766	69.8496	7.31669	16.3233	353.472	35.3036	640.792	63.7463	75.1989	146.082	97.9416		FcRL5 BUV737	38.4	107	447	76.8	54.9	51.7	281	51.5	697	83.3	79.7	137	186
	CD20 v450	1440.16	4909.75	5372.37	2667.82	2439.24	1381.8	1295.9	1839.19	6953.87	4876.2	2816.63	2783.33	3098.34		CD20 v450	767	3754	3450	1322	1017	1310	1597	912	3669	2928	1539	1636	2260
	CD21 BV605	1022.77	1872.48	1454.66	1827.16	2078.36	505.077	1340.06	1325.34	782.497	2236.1	2594.17	2289.89	1741.95		CD21 BV605	973	1709	2445	1263	1525	631	2122	885	1402	1809	1907	1602	1937
	CD19 BV786	436	1638	1520	650	674	358	1651	490	2077	1265	723	690	880		CD19 BV786	237	1062	1181	317	313	324	1018	263	1111	740	393	431	602
	CD27 PE	8.59234	371.556	31.2809	-0.951673	9.7534	28.3181	1289.63	9.41822	536.979	57.6347	28.1677	16.7688	276.986		CD27 PE	28	507	54.2	24	32.1	77.3	1979	24.7	862	60.2	32.1	31.4	386
	T-bet PE-CF594	15	22.2	43.3	26	-5.1	11.9	26.1	1.99	40.8	21	35.5	19.9	22.9		T-bet PE-CF594	31	48.1	73.8	36.1	41	30.1	62	31	67.5	45.5	35.4	46.5	49.5
	CD38 PECy7	28.2358	1559.14	52.1662	277.661	196.782	420.559	7879.94	109.057	67.3051	1026.29	136.157	43.8146	65.9361		CD38 PECy7	36.2	1055	159	343	192	575	7602	167	185	668	106	51.3	138
																Cell count	1252	1592	1350	1796	2021	935	555	1829	285	1887	1139	1597	1767
	CD27-
	GC
	Plasmablasts
	Atypical
	CD27+
